# Supplementary material for: Towards Sustainable Urban Growth: The Role of Horizontal Ecological Compensation in Fostering Inclusive and Resilient Cities
Source: Research Square preprint supplement (doi:10.21203/rs.3.rs-5733666/v1), 2025-01-01
Supplement: Supplementary file 1 [file 77dd7def2f8a8a73e992ae64.xlsx]

## Sheet: Sheet1
Province	City	Regional division: East = 1; Centre = 2; West = 3;North-East = 4	Cities along the Yangtze River Basin: Yes = 1	Cities along the Yellow River Basin: Yes = 1	River Basin division: Upper reaches cities = 1; Middle reaches cities = 2; Lower reaches cities = 3
Shanxi	Taiyuan	2	0	1	2
Shanxi	Datong	2	0	1	2
Shanxi	Changzhi	2	0	1	2
Shanxi	Jincheng	2	0	1	2
Shanxi	Shuozhou	2	0	1	2
Shanxi	Jinzhong	2	0	1	2
Shanxi	Yuncheng	2	0	1	2
Shanxi	Xinzhou	2	0	1	2
Shanxi	Linfen	2	0	1	2
Shanxi	Lvliang	2	0	1	2
Inner Mongolia Autonomous Region	Hohhot	3	0	1	2
Inner Mongolia Autonomous Region	Baotou	3	0	1	2
Inner Mongolia Autonomous Region	Wuhai	3	0	1	2
Inner Mongolia Autonomous Region	Ordos	3	0	1	2
Inner Mongolia Autonomous Region	Bayannur	3	0	1	2
Shandong	Jinan	1	0	1	3
Shandong	Qingdao	1	0	1	3
Shandong	Zibo	1	0	1	3
Shandong	Zaozhuang	1	0	1	3
Shandong	Dongying	1	0	1	3
Shandong	Yantai	1	0	1	3
Shandong	Weifang	1	0	1	3
Shandong	Jining	1	0	1	3
Shandong	Tai'an	1	0	1	3
Shandong	Weihai	1	0	1	3
Shandong	Rizhao	1	0	1	3
Shandong	Linyi	1	0	1	3
Shandong	Dezhou	1	0	1	3
Shandong	Liaocheng	1	0	1	3
Shandong	Binzhou	1	0	1	3
Henan	Zhengzhou	2	0	1	3
Henan	Kaifeng	2	0	1	3
Henan	Luoyang	2	0	1	3
Henan	Pingdingshan	2	0	1	3
Henan	Anyang	2	0	1	3
Henan	Hebi	2	0	1	3
Henan	Xinxiang	2	0	1	3
Henan	Jiaozuo	2	0	1	3
Henan	Puyang	2	0	1	3
Henan	xuchang	2	0	1	3
Henan	luohe	2	0	1	3
Henan	Sanmenxia	2	0	1	3
Henan	Nanyang	2	0	1	3
Henan	Shangqiu	2	0	1	3
Henan	xinyang	2	0	1	3
Henan	zhoukou	2	0	1	3
Henan	Zhumadian	2	0	1	3
Shaanxi	Xi'an	3	0	1	2
Shaanxi	Tongchuan	3	0	1	2
Shaanxi	Baoji	3	0	1	2
Shaanxi	Xianyang	3	0	1	2
Shaanxi	Weinan	3	0	1	2
Shaanxi	Yan'an	3	0	1	2
Shaanxi	Hanzhong	3	0	1	2
Shaanxi	Yulin	3	0	1	2
Shaanxi	Ankang	3	0	1	2
Shaanxi	Shangluo	3	0	1	2
Gansu	Lanzhou	3	0	1	1
Gansu	Jiayuguan	3	0	1	1
Gansu	Jinchang	3	0	1	1
Gansu	Baiyin	3	0	1	1
Gansu	Tianshui	3	0	1	1
Gansu	Wuwei	3	0	1	1
Gansu	Zhangye	3	0	1	1
Gansu	Pingliang	3	0	1	1
Gansu	Jiuquan	3	0	1	1
Gansu	Qingyang	3	0	1	1
Gansu	Dingxi	3	0	1	1
Gansu	Longnan	3	0	1	1
Qinghai	Xining	3	0	1	1
Ningxia Hui Autonomous Region	Yinchuan	3	0	1	1
Ningxia Hui Autonomous Region	Shizuishan	3	0	1	1
Ningxia Hui Autonomous Region	Wuzhong	3	0	1	1
Ningxia Hui Autonomous Region	Guyuan	3	0	1	1
Ningxia Hui Autonomous Region	Zhongwei	3	0	1	1
Shanghai	Shanghai	1	1	0	3
Jiangsu	Wuxi	1	1	0	3
Jiangsu	Wuxi	1	1	0	3
Jiangsu	Xuzhou	1	1	0	3
Jiangsu	Changzhou	1	1	0	3
Jiangsu	Nantong	1	1	0	3
Jiangsu	Nantong	1	1	0	3
Jiangsu	Lianyungang	1	1	0	3
Jiangsu	Huaian	1	1	0	3
Jiangsu	Yancheng	1	1	0	3
Jiangsu	Yangzhou	1	1	0	3
Jiangsu	Zhenjiang	1	1	0	3
Jiangsu	Taizhou	1	1	0	3
Jiangsu	Suqian	1	1	0	3
Zhejiang	Hangzhou	1	1	0	3
Zhejiang	Ningbo	1	1	0	3
Zhejiang	Wenzhou	1	1	0	3
Zhejiang	Jiaxing	1	1	0	3
Zhejiang	Huzhou	1	1	0	3
Zhejiang	Shaoxing	1	1	0	3
Zhejiang	Jinhua	1	1	0	3
Zhejiang	Quzhou	1	1	0	3
Zhejiang	Zhoushan	1	1	0	3
Zhejiang	Taizhou	1	1	0	3
Zhejiang	Lishui	1	1	0	3
Anhui	Hefei	2	1	0	3
Anhui	Wuhu	2	1	0	3
Anhui	Bengbu	2	1	0	3
Anhui	Huainan	2	1	0	3
Anhui	Maanshan	2	1	0	3
Anhui	Huaibei	2	1	0	3
Anhui	Anqing	2	1	0	3
Anhui	Huangshan	2	1	0	3
Anhui	Chuzhou	2	1	0	3
Anhui	Fuyang	2	1	0	3
Anhui	Suzhou	2	1	0	3
Anhui	Lu'an	2	1	0	3
Anhui	Bozhou	2	1	0	3
Anhui	Chizhou	2	1	0	3
Anhui	Xuancheng	2	1	0	3
Jiangxi	Nanchang	2	1	0	2
Jiangxi	Jingdezhen	2	1	0	2
Jiangxi	Pingxiang	2	1	0	2
Jiangxi	Jiujiang	2	1	0	2
Jiangxi	Xinyu	2	1	0	2
Jiangxi	Yingtan	2	1	0	2
Jiangxi	Ganzhou	2	1	0	2
Jiangxi	Ji'an	2	1	0	2
Jiangxi	Yichun	2	1	0	2
Jiangxi	Fuzhou	2	1	0	2
Jiangxi	Shangrao	2	1	0	2
Hubei	Wuhan	2	1	0	2
Hubei	Huangshi	2	1	0	2
Hubei	Shiyan	2	1	0	2
Hubei	Yichang	2	1	0	2
Hubei	Xiangyang	2	1	0	2
Hubei	Ezhou	2	1	0	2
Hubei	Jingmen	2	1	0	2
Hubei	Xiaogan	2	1	0	2
Hubei	Jingzhou	2	1	0	2
Hubei	Huanggang	2	1	0	2
Hubei	Xianning	2	1	0	2
Hubei	Suizhou	2	1	0	2
Hunan	Changsha	2	1	0	2
Hunan	Zhuzhou	2	1	0	2
Hunan	Xiangtan	2	1	0	2
Hunan	Hengyang	2	1	0	2
Hunan	Shaoyang	2	1	0	2
Hunan	Yueyang	2	1	0	2
Hunan	Zhangjiajie	2	1	0	2
Hunan	Yiyang	2	1	0	2
Hunan	Chenzhou	2	1	0	2
Hunan	Yongzhou	2	1	0	2
Hunan	Huaihua	2	1	0	2
Hunan	Loudi	2	1	0	2
Chongqing	Chongqing	3	1	0	1
Sichuan	Chengdu	3	1	0	1
Sichuan	Zigong	3	1	0	1
Sichuan	Panzhihua	3	1	0	1
Sichuan	Luzhou	3	1	0	1
Sichuan	Deyang	3	1	0	1
Sichuan	Mianyang	3	1	0	1
Sichuan	Guangyuan	3	1	0	1
Sichuan	Suining	3	1	0	1
Sichuan	Neijiang	3	1	0	1
Sichuan	Leshan	3	1	0	1
Sichuan	Nanchong	3	1	0	1
Sichuan	Meishan	3	1	0	1
Sichuan	Yibin	3	1	0	1
Sichuan	Guang'an	3	1	0	1
Sichuan	Dazhou	3	1	0	1
Sichuan	Ya'an	3	1	0	1
Sichuan	Bazhong	3	1	0	1
Sichuan	Ziyang	3	1	0	1
Guizhou	Guiyang	3	1	0	1
Guizhou	Liupanshui	3	1	0	1
Guizhou	Zunyi	3	1	0	1
Guizhou	Anshun	3	1	0	1
Yunnan	Kunming	3	1	0	1
Yunnan	Qujing	3	1	0	1
Yunnan	Yuxi	3	1	0	1
Yunnan	Baoshan	3	1	0	1
Yunnan	Zhaotong	3	1	0	1
Yunnan	Lijiang	3	1	0	1
Yunnan	Lincang	3	1	0	1
